# Supplementary material for: Diffusion-weighted MRI-derived ADC values reflect collagen I content in PDX models of uterine cervical cancer
Source: PubMed Central journal article supplement (PMC5739670; doi:10.18632/oncotarget.22388), 2017-11-11
Supplement: oncotarget-08-105682-s001.pdf [file oncotarget-08-105682-s001.pdf]

# Diffusion-weighted MRI-derived ADC values reflect collagen I content in PDX models of uterine cervical cancer

## SUPPLEMENTARY MATERIALS

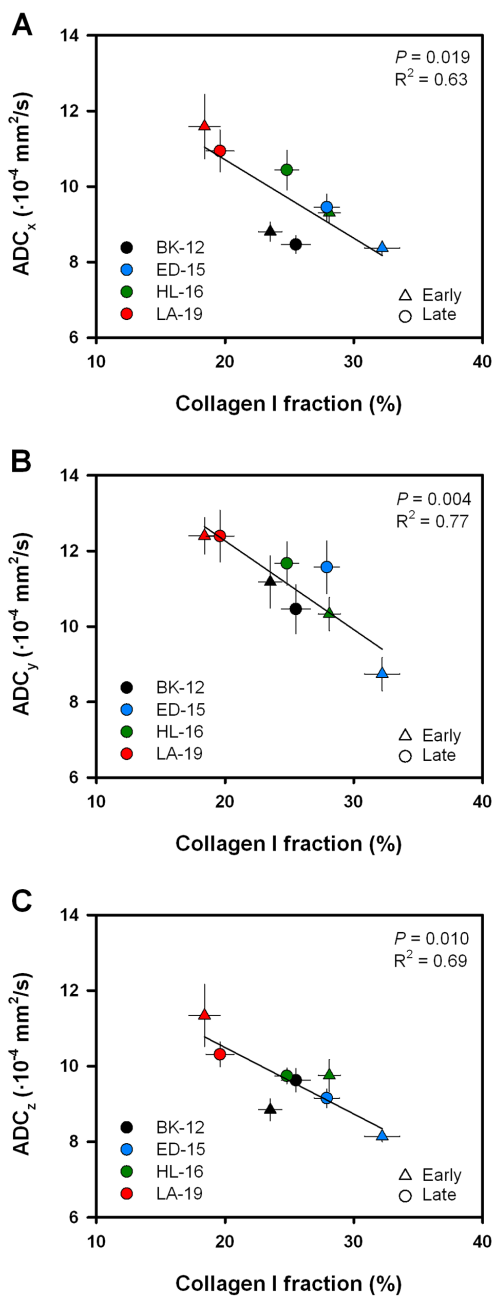

**Supplementary Figure 1: ADC versus collagen I fraction for each diffusion gradient direction.** ADC<sub>x</sub> (A), ADC<sub>y</sub> (B), and ADC<sub>z</sub> (C) plotted as a function of collagen I fraction for early generation (triangles) and late generation (dots) tumors of each PDX model. Symbols: mean  $\pm$  SEM of 10–28 tumor median values. Curves: linear regression lines.
